# Supplementary material for: Enhancing the electronic properties and quantum efficiency of sulfonyl/phosphoryl-substituted blue iridium complexes via different ancillary ligands
Source: Royal Society of Chemistry journal article supplement (doi:10.1039/c5nj00316d), 2015-01-01
Supplement: c5nj00316d1.pdf [file c5nj00316d1.pdf]

**Enhancing the electronic properties and quantum efficiency of  
sulfonyl/phosphoryl-substituted blue iridium complexes via different ancillary  
ligands**

Yanling Si<sup>a</sup>, Shuai Zhang<sup>a</sup>, Nan Qu<sup>a</sup>, Guoyou Luan<sup>\*a</sup> and Zhijian Wu<sup>\*b</sup>

<sup>a</sup> College of Resource and Environmental Science, Jilin Agricultural University, Changchun, Jilin 130118, P. R. China.

<sup>b</sup> State Key Laboratory of Rare Earth Resource Utilization, Changchun Institute of Applied Chemistry, Chinese Academy of Sciences, Changchun 130022, P. R. China.

Table S1 Main optimized geometry structural parameters of the complex **1a** in the ground at the DFT/PBE0, DFT/ B3LYP and DFT/ M062X level, respectively, together with the experimental values

| item        | PBE0   | B3LYP | M062X | Exp. <sup>21</sup> |
|-------------|--------|-------|-------|--------------------|
| Bond Length |        |       |       |                    |
| Ir-N1       | 2.037  | 2.062 | 2.052 | 2.020              |
| Ir-C1       | 1.986  | 2.005 | 1.978 | 1.989              |
| Ir-C2       | 1.992  | 2.008 | 1.984 | 1.998              |
| Ir-N2       | 2.048  | 2.074 | 2.070 | 2.039              |
| Ir-N3       | 2.163  | 2.205 | 2.213 | 2.140              |
| Ir-O1       | 2.149  | 2.172 | 2.183 | 2.149              |
| Bond Angle  |        |       |       |                    |
| N1-Ir-C1    | 80.7   | 80.4  | 80.7  | 81.3               |
| N1-Ir-C2    | 95.18  | 95.5  | 95.1  | 95.0               |
| N1-Ir-N2    | 175.5  | 175.6 | 175.6 | 175.7              |
| N1-Ir-O1    | 93.4   | 93.4  | 93.2  | 92.3               |
| N1-Ir-N3    | 88.5   | 88.4  | 88.2  | 88.3               |
| C1-Ir-C2    | 90.7   | 91.4  | 87.0  | 88.0               |
| C1-Ir-N2    | 98.2   | 98.4  | 97.8  | 96.8               |
| C1-Ir-O1    | 171.9  | 171.5 | 172.0 | 171.0              |
| C1-Ir-N3    | 97.0   | 97.3  | 98.2  | 95.9               |
| C2-Ir-N2    | 80.5   | 80.2  | 80.7  | 81.1               |
| C2-Ir-O1    | 95.3   | 95.1  | 99.1  | 98.8               |
| C2-Ir-N3    | 171.8  | 170.9 | 174.3 | 175.2              |
| N2-Ir-O1    | 88.1   | 88.2  | 88.5  | 90.0               |
| N2-Ir-N3    | 95.9   | 95.9  | 96.2  | 95.7               |
| O1-Ir-N3    | 77.1   | 76.5  | 76.0  | 77.6               |
| Dihedral    |        |       |       |                    |
| Angle/deg   |        |       |       |                    |
| C-C-S1-C    | 96.8   | 95.8  | 83.7  | 103.9              |
| C-C-S2-C    | -84.73 | -86.3 | -70.6 | -79.2              |

Table S2 Calculated phosphorescent emission wavelength (nm)/energies (eV), of the complexes **1a** and **2a** in CH<sub>2</sub>Cl<sub>2</sub> media with the TDDFT method at the B3LYP, M062X and PBE0 level, respectively, together with the experimental values

|           | $\lambda_{\text{cal}}/E(\text{eV})$<br>(B3LYP) | $\lambda_{\text{cal}}/E(\text{eV})$<br>(M062X) | $\lambda_{\text{cal}}/E(\text{eV})$<br>(PBE0) | Exp. <sup>21</sup> |
|-----------|------------------------------------------------|------------------------------------------------|-----------------------------------------------|--------------------|
| <b>1a</b> | 525/2.36                                       | 460/ 2.69                                      | 537/2.31                                      | 459                |
| <b>2a</b> | 525/2.36                                       | 461/2.69                                       | 537/2.31                                      | 460                |

Table S3 Calculated wavelength (nm), oscillator strength (*f*) and dominant orbital excitations of the lowest singlet and triplet absorptions for **2a-2d**

|           | state           | $\lambda_{\text{cal}}$ | <i>f</i> | Configuration                                           | Character                                          | Exp. <sup>21</sup> |
|-----------|-----------------|------------------------|----------|---------------------------------------------------------|----------------------------------------------------|--------------------|
| <b>2a</b> | S <sub>1</sub>  | 379                    | 0.0537   | HOMO->LUMO (76%),<br>HOMO->L+1 (16%)                    | MLCT/ILCT/LLCT<br>MLCT/ILCT/LLCT                   | 374                |
|           | S <sub>21</sub> | 283                    | 0.4047   | HOMO->L+6 (38%),<br>HOMO->L+7 (16%)                     | MLCT/ILCT<br>MLCT/ILCT                             |                    |
|           | T <sub>1</sub>  | 427                    | 0.0000   | H-1->L+2 (12%),<br>HOMO->LUMO (32%),<br>HOMO->L+1 (11%) | MLCT/ILCT/LLCT<br>MLCT/ILCT/LLCT<br>MLCT/ILCT/LLCT |                    |
| <b>2b</b> | S <sub>1</sub>  | 365                    | 0.0407   | HOMO->LUMO (84%)                                        | MLCT/ILCT/LLCT                                     |                    |
|           | S <sub>37</sub> | 257                    | 0.2810   | H-4->L+4 (14%),<br>H-3->L+4 (14%),<br>H-2->L+4 (24%)    | ILCT<br>MLCT/ILCT<br>ILCT/LLCT                     |                    |
|           | T <sub>1</sub>  | 420                    | 0.0000   | HOMO->LUMO (25%),<br>HOMO->L+2 (20%)                    | MLCT/ILCT/LLCT<br>MLCT/ILCT                        |                    |
| <b>2c</b> | S <sub>1</sub>  | 365                    | 0.0392   | HOMO->LUMO (93%)                                        | MLCT/ILCT                                          |                    |
|           | S <sub>29</sub> | 258                    | 0.2976   | H-4->L+4 (13%),<br>H-3->L+4 (17%),<br>H-2->L+4 (31%)    | ILCT<br>MLCT/ILCT<br>ILCT/LLCT                     |                    |
|           | T <sub>1</sub>  | 420                    | 0.0000   | H-2->L+1 (17%),<br>HOMO->LUMO (28%),<br>HOMO->L+1 (16%) | ILCT/LLCT<br>MLCT/ILCT<br>MLCT/ILCT                |                    |
| <b>2d</b> | S <sub>1</sub>  | 364                    | 0.0446   | HOMO->LUMO (72%),<br>HOMO->L+1 (21%)                    | MLCT/ILCT/LLCT<br>MLCT/ILCT/LLCT                   |                    |
|           | S <sub>21</sub> | 276                    | 0.2948   | HOMO->L+7 (55%)                                         | MLCT/ILCT                                          |                    |
|           | T <sub>1</sub>  | 419                    | 0.0000   | H-1->L+2 (19%),<br>HOMO->LUMO (22%),<br>HOMO->L+2 (15%) | MLCT/ILCT/LLCT<br>MLCT/ILCT/LLCT<br>MLCT/ILCT      |                    |

Table S4 Molecular orbital composition (%) of **1a** in the ground state

| MO   | Energy(ev<br>) | Composition (100%) |      |      |     | Assign                                    |
|------|----------------|--------------------|------|------|-----|-------------------------------------------|
|      |                | Ir                 | SOF1 | SOF2 | pic |                                           |
| L+5  | -1.13          | 1                  | 71   | 11   | 17  | $\pi^*(\text{SOF}+\text{pic})$            |
| L+4  | -1.18          | 2                  | 61   | 28   | 9   | $\pi^*(\text{SOF})$                       |
| L+3  | -1.43          | 1                  | 33   | 17   | 49  | $\pi^*(\text{SOF}+\text{pic})$            |
| L+2  | -1.79          | 4                  | 1    | 73   | 22  | $\pi^*(\text{SOF}+\text{pic})$            |
| L+1  | -1.83          | 3                  | 16   | 15   | 66  | $\pi^*(\text{SOF}+\text{pic})$            |
| LUMO | -1.93          | 3                  | 78   | 7    | 11  | $\pi^*(\text{SOF}+\text{pic})$            |
| HOMO | -6.2           | 39                 | 24   | 30   | 7   | $d(\text{Ir})+\pi(\text{SOF})$            |
| H-1  | -6.58          | 47                 | 5    | 18   | 29  | $d(\text{Ir})+\pi(\text{SOF}+\text{pic})$ |
| H-2  | -6.85          | 3                  | 14   | 62   | 21  | $\pi(\text{SOF}+\text{pic})$              |
| H-3  | -6.95          | 23                 | 50   | 21   | 7   | $d(\text{Ir})+\pi(\text{SOF})$            |
| H-4  | -6.97          | 10                 | 10   | 19   | 61  | $d(\text{Ir})+\pi(\text{SOF}+\text{pic})$ |
| H-5  | -7.1           | 27                 | 32   | 25   | 16  | $d(\text{Ir})+\pi(\text{SOF}+\text{pic})$ |

Table S5 Molecular orbital composition (%) of **1b** in the ground state

| MO   | Energy(ev<br>) | Composition (100%) |      |      |     | Assign                                    |
|------|----------------|--------------------|------|------|-----|-------------------------------------------|
|      |                | Ir                 | SOF1 | SOF2 | taz |                                           |
| L+5  | -1.2           | 1                  | 39   | 28   | 31  | $\pi^*(\text{SOF}+\text{taz})$            |
| L+4  | -1.27          | 2                  | 51   | 26   | 21  | $\pi^*(\text{SOF}+\text{taz})$            |
| L+3  | -1.47          | 1                  | 47   | 16   | 35  | $\pi^*(\text{SOF}+\text{taz})$            |
| L+2  | -1.85          | 4                  | 1    | 85   | 10  | $\pi^*(\text{SOF}+\text{taz})$            |
| L+1  | -1.91          | 3                  | 7    | 9    | 81  | $\pi^*(\text{SOF}+\text{taz})$            |
| LUMO | -2.04          | 3                  | 87   | 2    | 7   | $\pi^*(\text{SOF})$                       |
| HOMO | -6.41          | 35                 | 20   | 41   | 4   | $d(\text{Ir})+\pi(\text{SOF})$            |
| H-1  | -6.62          | 28                 | 5    | 8    | 59  | $d(\text{Ir})+\pi(\text{SOF}+\text{taz})$ |
| H-2  | -6.9           | 4                  | 11   | 76   | 9   | $\pi(\text{SOF})$                         |
| H-3  | -7.04          | 11                 | 59   | 27   | 2   | $d(\text{Ir})+\pi(\text{SOF})$            |
| H-4  | -7.15          | 29                 | 33   | 23   | 15  | $d(\text{Ir})+\pi(\text{SOF}+\text{taz})$ |
| H-5  | -7.28          | 21                 | 25   | 27   | 28  | $d(\text{Ir})+\pi(\text{SOF}+\text{taz})$ |

Table S6 Molecular orbital composition (%) of **1c** in the ground state

| MO   | Energy(ev ) | Composition (100%) |      |      |      | Assign                                     |
|------|-------------|--------------------|------|------|------|--------------------------------------------|
|      |             | Ir                 | SOF1 | SOF2 | bptz |                                            |
| L+5  | -1.17       | 1                  | 89   | 3    | 7    | $\pi^*(\text{SOF})$                        |
| L+4  | -1.21       | 2                  | 45   | 42   | 12   | $\pi^*(\text{SOF}+\text{bptz})$            |
| L+3  | -1.4        | 1                  | 54   | 18   | 26   | $\pi^*(\text{SOF}+\text{bptz})$            |
| L+2  | -1.71       | 3                  | 1    | 4    | 92   | $\pi^*(\text{bptz})$                       |
| L+1  | -1.81       | 3                  | 3    | 90   | 4    | $\pi^*(\text{SOF})$                        |
| LUMO | -1.98       | 4                  | 92   | 2    | 3    | $\pi^*(\text{SOF})$                        |
| HOMO | -6.34       | 36                 | 20   | 40   | 4    | $d(\text{Ir})+\pi(\text{SOF})$             |
| H-1  | -6.53       | 27                 | 5    | 8    | 61   | $d(\text{Ir})+\pi(\text{SOF}+\text{bptz})$ |
| H-2  | -6.84       | 5                  | 11   | 75   | 9    | $\pi(\text{SOF}+\text{bptz})$              |
| H-3  | -6.98       | 16                 | 56   | 25   | 3    | $d(\text{Ir})+\pi(\text{SOF})$             |
| H-4  | -7.08       | 30                 | 29   | 22   | 19   | $d(\text{Ir})+\pi(\text{SOF}+\text{bptz})$ |
| H-5  | -7.22       | 24                 | 17   | 27   | 32   | $d(\text{Ir})+\pi(\text{SOF}+\text{bptz})$ |

Table S7 Molecular orbital composition (%) of **1d** in the ground state

| MO   | Energy(ev ) | Composition (100%) |      |      |    | Assign                                   |
|------|-------------|--------------------|------|------|----|------------------------------------------|
|      |             | Ir                 | SOF1 | SOF2 | N4 |                                          |
| L+5  | -1.23       | 1                  | 76   | 12   | 11 | $\pi^*(\text{SOF}+\text{N4})$            |
| L+4  | -1.28       | 2                  | 56   | 17   | 26 | $\pi^*(\text{SOF}+\text{N4})$            |
| L+3  | -1.48       | 1                  | 43   | 16   | 40 | $\pi^*(\text{SOF}+\text{N4})$            |
| L+2  | -1.87       | 4                  | 1    | 88   | 7  | $\pi^*(\text{SOF})$                      |
| L+1  | -1.93       | 3                  | 7    | 6    | 84 | $\pi^*(\text{SOF}+\text{N4})$            |
| LUMO | -2.05       | 3                  | 86   | 3    | 8  | $\pi^*(\text{SOF})$                      |
| HOMO | -6.4        | 34                 | 21   | 40   | 5  | $d(\text{Ir})+\pi(\text{SOF})$           |
| H-1  | -6.8        | 32                 | 7    | 35   | 26 | $d(\text{Ir})+\pi(\text{SOF}+\text{N4})$ |
| H-2  | -6.95       | 11                 | 12   | 51   | 26 | $d(\text{Ir})+\pi(\text{SOF}+\text{N4})$ |
| H-3  | -7.05       | 9                  | 59   | 26   | 5  | $\pi(\text{SOF})$                        |
| H-4  | -7.16       | 27                 | 29   | 22   | 22 | $d(\text{Ir})+\pi(\text{SOF}+\text{N4})$ |
| H-5  | -7.27       | 14                 | 18   | 31   | 37 | $d(\text{Ir})+\pi(\text{SOF}+\text{N4})$ |

Table S8 Molecular orbital composition (%) of **2a** in the ground state

| MO   | Energy(ev<br>) | Composition (100%) |      |      |     | Assign                                    |
|------|----------------|--------------------|------|------|-----|-------------------------------------------|
|      |                | Ir                 | POF1 | POF2 | pic |                                           |
| L+5  | -0.93          | 2                  | 61   | 7    | 30  | $\pi^*(\text{POF}+\text{pic})$            |
| L+4  | -0.97          | 1                  | 20   | 72   | 6   | $\pi^*(\text{POF})$                       |
| L+3  | -1.26          | 1                  | 17   | 19   | 63  | $\pi^*(\text{POF}+\text{pic})$            |
| L+2  | -1.61          | 4                  | 13   | 77   | 6   | $\pi^*(\text{POF})$                       |
| L+1  | -1.64          | 5                  | 67   | 5    | 22  | $\pi^*(\text{POF}+\text{pic})$            |
| LUMO | -1.72          | 2                  | 14   | 13   | 71  | $\pi^*(\text{POF}+\text{pic})$            |
| HOMO | -5.95          | 39                 | 25   | 30   | 6   | $d(\text{Ir})+\pi(\text{POF})$            |
| H-1  | -6.38          | 45                 | 6    | 24   | 25  | $d(\text{Ir})+\pi(\text{POF}+\text{pic})$ |
| H-2  | -6.62          | 8                  | 14   | 64   | 14  | $\pi(\text{POF}+\text{pic})$              |
| H-3  | -6.69          | 21                 | 62   | 13   | 3   | $d(\text{Ir})+\pi(\text{POF})$            |
| H-4  | -6.8           | 8                  | 9    | 22   | 62  | $\pi(\text{POF}+\text{pic})$              |
| H-5  | -6.9           | 13                 | 14   | 69   | 4   | $d(\text{Ir})+\pi(\text{POF})$            |

Table S9 Molecular orbital composition (%) of **2b** in the ground state

| MO   | Energy(ev<br>) | Composition (100%) |      |      |     | Assign                                    |
|------|----------------|--------------------|------|------|-----|-------------------------------------------|
|      |                | Ir                 | POF1 | POF2 | taz |                                           |
| L+5  | -1.07          | 1                  | 9    | 44   | 46  | $\pi^*(\text{POF}+\text{taz})$            |
| L+4  | -1.11          | 2                  | 60   | 33   | 5   | $\pi^*(\text{POF})$                       |
| L+3  | -1.32          | 1                  | 30   | 21   | 48  | $\pi^*(\text{POF}+\text{taz})$            |
| L+2  | -1.71          | 4                  | 1    | 88   | 7   | $\pi^*(\text{POF})$                       |
| L+1  | -1.78          | 4                  | 29   | 4    | 63  | $\pi^*(\text{POF}+\text{taz})$            |
| LUMO | -1.85          | 2                  | 65   | 4    | 28  | $\pi^*(\text{POF}+\text{taz})$            |
| HOMO | -6.2           | 35                 | 22   | 40   | 3   | $d(\text{Ir})+\pi(\text{POF})$            |
| H-1  | -6.5           | 31                 | 6    | 11   | 52  | $d(\text{Ir})+\pi(\text{POF}+\text{taz})$ |
| H-2  | -6.7           | 4                  | 10   | 73   | 13  | $\pi(\text{POF}+\text{taz})$              |
| H-3  | -6.84          | 12                 | 68   | 18   | 1   | $d(\text{Ir})+\pi(\text{POF})$            |
| H-4  | -6.9           | 2                  | 2    | 96   | 0   | $\pi(\text{POF})$                         |
| H-5  | -7             | 24                 | 34   | 31   | 11  | $d(\text{Ir})+\pi(\text{POF}+\text{taz})$ |

Table S10 Molecular orbital composition (%) of **2c** in the ground state

| MO   | Energy(eV) | Composition (100%) |      |      |      | Assign                                     |
|------|------------|--------------------|------|------|------|--------------------------------------------|
|      |            | Ir                 | POF1 | POF2 | pbtz |                                            |
| L+5  | -1         | 1                  | 10   | 30   | 59   | $\pi^*(\text{POF}+\text{bptz})$            |
| L+4  | -1.06      | 2                  | 51   | 44   | 3    | $\pi^*(\text{POF})$                        |
| L+3  | -1.25      | 1                  | 37   | 24   | 37   | $\pi^*(\text{POF}+\text{bptz})$            |
| L+2  | -1.6       | 4                  | 1    | 7    | 88   | $\pi^*(\text{bptz})$                       |
| L+1  | -1.67      | 3                  | 5    | 85   | 7    | $\pi^*(\text{POF})$                        |
| LUMO | -1.79      | 4                  | 89   | 3    | 4    | $\pi^*(\text{POF})$                        |
| HOMO | -6.15      | 36                 | 21   | 40   | 3    | $d(\text{Ir})+\pi(\text{POF})$             |
| H-1  | -6.42      | 30                 | 5    | 9    | 56   | $d(\text{Ir})+\pi(\text{POF}+\text{bptz})$ |
| H-2  | -6.65      | 4                  | 10   | 75   | 11   | $\pi(\text{POF}+\text{bptz})$              |
| H-3  | -6.79      | 16                 | 64   | 18   | 2    | $d(\text{Ir})+\pi(\text{POF})$             |
| H-4  | -6.87      | 2                  | 3    | 94   | 1    | $\pi(\text{POF})$                          |
| H-5  | -6.94      | 27                 | 29   | 29   | 15   | $d(\text{Ir})+\pi(\text{POF}+\text{bptz})$ |

Table S11 Molecular orbital composition (%) of **2d** in the ground state

| MO   | Energy(eV) | Composition (100%) |      |      |    | Assign                                   |
|------|------------|--------------------|------|------|----|------------------------------------------|
|      |            | Ir                 | POF1 | POF2 | N4 |                                          |
| L+5  | -1.09      | 1                  | 4    | 59   | 36 | $\pi^*(\text{POF}+\text{N4})$            |
| L+4  | -1.12      | 2                  | 68   | 20   | 10 | $\pi^*(\text{POF}+\text{N4})$            |
| L+3  | -1.34      | 1                  | 28   | 19   | 52 | $\pi^*(\text{POF}+\text{N4})$            |
| L+2  | -1.72      | 4                  | 2    | 90   | 5  | $\pi^*(\text{POF})$                      |
| L+1  | -1.8       | 4                  | 31   | 2    | 63 | $\pi^*(\text{POF}+\text{N4})$            |
| LUMO | -1.86      | 2                  | 63   | 4    | 31 | $\pi^*(\text{POF}+\text{N4})$            |
| HOMO | -6.2       | 35                 | 21   | 39   | 5  | $d(\text{Ir})+\pi(\text{POF})$           |
| H-1  | -6.63      | 25                 | 9    | 51   | 14 | $d(\text{Ir})+\pi(\text{POF}+\text{N4})$ |
| H-2  | -6.79      | 22                 | 11   | 34   | 32 | $d(\text{Ir})+\pi(\text{POF}+\text{N4})$ |
| H-3  | -6.85      | 11                 | 65   | 20   | 4  | $d(\text{Ir})+\pi(\text{POF})$           |
| H-4  | -6.9       | 1                  | 2    | 97   | 0  | $\pi(\text{POF})$                        |
| H-5  | -7.01      | 24                 | 32   | 28   | 16 | $d(\text{Ir})+\pi(\text{POF}+\text{N4})$ |

Table S12 Optimized S<sub>0</sub> structure for the complex **1a**

|    |             |             |             |   |             |             |             |
|----|-------------|-------------|-------------|---|-------------|-------------|-------------|
| Ir | 2.12858400  | -0.70346200 | 0.11878700  | C | 2.92958100  | 0.71896500  | 4.08470200  |
| O  | 3.38976300  | -2.26381900 | 0.88861200  | H | 3.39556400  | 0.30842400  | 4.97365000  |
| N  | 1.83519500  | -1.85673900 | -1.54816100 | C | 1.12362500  | 1.97229600  | 0.47677200  |
| N  | 4.11216700  | -0.02913000 | -0.42072500 | C | 0.54105200  | 1.13855200  | -1.71909900 |
| C  | 0.41519000  | -1.58409300 | 0.62408100  | H | 0.50872400  | 0.36482500  | -2.48000500 |
| O  | 5.53263500  | -2.94087500 | 1.00304300  | C | -0.05689300 | 3.42518100  | -1.11049800 |
| C  | 1.14904200  | 0.91655800  | -0.48152100 | C | 0.52676400  | 3.18360700  | 0.13489800  |
| C  | 0.76218400  | -2.69742500 | -1.51232900 | C | -0.04998900 | 2.35548800  | -2.01816700 |
| C  | -0.04800200 | -2.55039000 | -0.30884600 | S | -0.72581600 | 5.04626400  | -1.48456000 |
| C  | 4.43825100  | 1.11400700  | -1.04030800 | F | 0.48966800  | 4.17359400  | 1.03630300  |
| H  | 3.61159100  | 1.76534900  | -1.30698900 | F | -0.61987200 | 2.48469600  | -3.20996600 |
| C  | 2.47390100  | -2.70378300 | -3.69138000 | O | -3.12308800 | -5.42797500 | 1.01985900  |
| H  | 3.16840400  | -2.67068800 | -4.52351400 | O | -3.88065600 | -3.78159800 | 2.79580800  |
| C  | 4.65805100  | -2.15558600 | 0.67110700  | C | -4.82118400 | -3.99163500 | -0.92472200 |
| C  | -0.33897300 | -1.36310500 | 1.77573200  | H | -4.24689200 | -4.87290800 | -1.19065400 |
| H  | -0.04839400 | -0.62567100 | 2.51643500  | C | -4.62125100 | -3.38769300 | 0.31229600  |
| C  | 0.53544800  | -3.57411800 | -2.58012800 | C | -5.35984400 | -2.27066900 | 0.69776100  |
| H  | -0.30852800 | -4.24695400 | -2.54364000 | H | -5.20161800 | -1.83134100 | 1.67820900  |
| C  | -1.96167200 | -3.06870100 | 1.13672000  | C | -6.30182800 | -1.75089300 | -0.17984900 |
| C  | 2.83954200  | -0.05129400 | 2.93756000  | H | -6.88334000 | -0.88008400 | 0.11415200  |
| H  | 3.21323600  | -1.06848000 | 2.87423500  | O | 0.22878700  | 6.03369000  | -0.99015700 |
| C  | 1.81136100  | 2.48544500  | 2.89823700  | O | -1.14562300 | 5.04497400  | -2.88045100 |
| H  | 1.39541400  | 3.48201500  | 2.86440600  | C | -2.19001400 | 5.13747200  | -0.47721400 |
| C  | 2.65741200  | -1.86456900 | -2.60732900 | C | -2.14045400 | 5.77588700  | 0.75817100  |
| H  | 3.48439400  | -1.16619100 | -2.56415600 | H | -1.20910800 | 6.21683300  | 1.09733200  |
| C  | 5.08096600  | -0.88588600 | -0.05506100 | C | -4.51967900 | 4.66172700  | -0.17354900 |
| C  | 2.40866000  | 2.00957800  | 4.05648800  | H | -5.44881700 | 4.23164500  | -0.53995400 |
| H  | 2.46092500  | 2.64510100  | 4.93578400  | C | -3.37531400 | 4.58369700  | -0.95647600 |
| C  | 6.42134000  | -0.62362900 | -0.31295200 | H | -3.39538700 | 4.11276500  | -1.93474000 |
| H  | 7.14694900  | -1.36271200 | 0.00945900  | C | -3.29734400 | 5.84670700  | 1.52588200  |
| C  | -1.21537400 | -3.25859400 | -0.02763100 | H | -3.26821200 | 6.34603900  | 2.49149900  |
| C  | 5.75575000  | 1.44211900  | -1.32788100 | C | -4.49960000 | 5.29202400  | 1.07615800  |
| H  | 5.97756400  | 2.37759600  | -1.83100100 | C | -5.75132500 | 5.39895800  | 1.90046100  |
| C  | 1.73929100  | 1.66599800  | 1.76644800  | H | -5.52369400 | 5.46701700  | 2.96872800  |
| C  | -1.49625400 | -2.08339300 | 2.01909400  | H | -6.40823200 | 4.53727500  | 1.74522400  |
| S  | -3.42185000 | -4.06382400 | 1.44147200  | H | -6.32107000 | 6.29690200  | 1.62898300  |
| F  | -1.67441600 | -4.14905400 | -0.91652200 | C | -5.77132700 | -3.45817700 | -1.78894300 |
| F  | -2.17276000 | -1.80163800 | 3.12639500  | H | -5.93665800 | -3.92671900 | -2.75628900 |
| C  | 1.39169100  | -3.57866800 | -3.66882700 | C | -6.52299400 | -2.33457600 | -1.43321900 |
| H  | 1.21428500  | -4.26199200 | -4.49408100 | C | -7.56975800 | -1.78216300 | -2.35908100 |
| C  | 6.76644000  | 0.55608200  | -0.95941800 | H | -7.60203000 | -0.68831600 | -2.32034000 |
| H  | 7.80630200  | 0.78683100  | -1.17321700 | H | -8.56710600 | -2.14671200 | -2.08190900 |
| N  | 2.26946900  | 0.41267000  | 1.81636600  | H | -7.38731900 | -2.08140500 | -3.39562000 |

Table S13 Optimized S<sub>0</sub> structure for the complex **2a**

|    |             |             |             |   |             |            |             |
|----|-------------|-------------|-------------|---|-------------|------------|-------------|
| Ir | -0.01647600 | -2.16005600 | 0.01228800  | F | -3.77364400 | 0.25718800 | -2.68860400 |
| O  | 1.33942600  | -3.83214300 | -0.03445000 | F | -3.25738200 | 1.77633400 | 1.71836000  |
| N  | 0.59808900  | -1.80799900 | 1.93369700  | O | 4.59903500  | 3.27825700 | -1.90462700 |
| N  | -1.29814500 | -3.83900000 | 0.48947900  | C | 5.90097200  | 3.15472600 | 1.78340700  |
| C  | 1.38459700  | -0.78768600 | -0.33531200 | H | 6.67626600  | 2.40491900 | 1.65321200  |
| O  | 1.46625300  | -6.04526700 | 0.35369100  | C | 4.90303000  | 3.30560700 | 0.81834500  |
| C  | -1.43803700 | -0.77611800 | -0.08098700 | C | 3.92726700  | 4.29458000 | 0.98422100  |
| C  | 1.65666300  | -0.95950900 | 2.07631900  | H | 3.17742500  | 4.44066100 | 0.21114000  |
| C  | 2.10860900  | -0.38162900 | 0.81799700  | C | 3.93475200  | 5.10268000 | 2.11632000  |
| C  | -2.62247800 | -3.81325900 | 0.69454000  | H | 3.17319800  | 5.86808500 | 2.23970900  |
| H  | -3.09798800 | -2.83999600 | 0.61988600  | O | -6.01848900 | 1.55649500 | -1.82437700 |
| C  | 0.51971700  | -2.17207500 | 4.29623200  | C | -4.47887600 | 3.73968800 | -1.10308100 |
| H  | 0.04350700  | -2.66746000 | 5.13514400  | C | -5.13481100 | 4.44760300 | -2.11430000 |
| C  | 0.85877500  | -4.98723600 | 0.28027100  | H | -5.96397700 | 3.97359600 | -2.63253900 |
| C  | 1.75083000  | -0.24410500 | -1.56617800 | C | -2.96841300 | 5.59875700 | -0.78891400 |
| H  | 1.24715100  | -0.51906700 | -2.48678700 | H | -2.11838100 | 6.04398100 | -0.27908500 |
| C  | 2.16941100  | -0.70719800 | 3.35576100  | C | -3.38723600 | 4.31702100 | -0.44521700 |
| H  | 3.00555700  | -0.03266700 | 3.46707000  | H | -2.86072100 | 3.76902200 | 0.33123700  |
| C  | 3.52950400  | 1.10241100  | -0.54151800 | C | -4.70987600 | 5.72834900 | -2.45605500 |
| C  | 0.05649600  | -3.22660400 | -2.76926900 | H | -5.21876200 | 6.27433900 | -3.24580300 |
| H  | 0.87134800  | -3.79013500 | -2.32573700 | C | -3.62963800 | 6.30458000 | -1.79268600 |
| C  | -2.01364000 | -1.69837600 | -3.70258900 | C | 5.91027700  | 3.96982800 | 2.91193300  |
| H  | -2.82971100 | -1.08310400 | -4.05239400 | H | 6.69260100  | 3.85069100 | 3.65693100  |
| C  | 0.05403000  | -2.38962700 | 3.01233400  | C | 4.92543900  | 4.93963200 | 3.08246100  |
| H  | -0.78458700 | -3.04720600 | 2.81747300  | H | -3.29540500 | 7.30282200 | -2.06263700 |
| C  | -0.63892400 | -5.00830900 | 0.55622600  | H | 4.93579800  | 5.57574700 | 3.96375700  |
| C  | -1.37925000 | -2.58434700 | -4.56038300 | P | -5.11904500 | 2.07736700 | -0.74818100 |
| H  | -1.70732900 | -2.66132100 | -5.59301400 | P | 4.84026300  | 2.36830600 | -0.74293300 |
| C  | -1.29422100 | -6.19891100 | 0.84846400  | C | -6.00625300 | 2.15380800 | 0.84169900  |
| H  | -0.69569600 | -7.10272600 | 0.88807600  | C | -6.96695400 | 1.15779400 | 1.04709300  |
| C  | 3.16191800  | 0.52260500  | 0.66902600  | C | -5.85047400 | 3.16678800 | 1.79055300  |
| C  | -3.34194500 | -4.96344000 | 0.98739800  | C | -7.74041200 | 1.15887800 | 2.20365400  |
| H  | -4.41357800 | -4.89994100 | 1.14584100  | H | -7.12033900 | 0.40324200 | 0.28033400  |
| C  | -1.58873800 | -1.59210600 | -2.37292400 | C | -6.63077000 | 3.16974000 | 2.94256400  |
| C  | 2.79117300  | 0.66549400  | -1.65236800 | H | -5.12654000 | 3.95993900 | 1.62806000  |
| F  | 3.89851800  | 0.84349900  | 1.75315300  | C | -7.57106700 | 2.16358800 | 3.15337200  |
| F  | 3.10883300  | 1.12547400  | -2.85899500 | H | -8.48539100 | 0.38266400 | 2.35724600  |
| C  | 1.60248800  | -1.31326300 | 4.46426100  | H | -6.50828600 | 3.96321400 | 3.67492600  |
| H  | 2.00331600  | -1.11427800 | 5.45394700  | H | -8.18037600 | 2.16993200 | 4.05342600  |
| C  | -2.66521500 | -6.17898300 | 1.06872100  | C | 6.39310900  | 1.43622800 | -0.88349900 |
| H  | -3.20293200 | -7.09492400 | 1.29737300  | C | 7.29321600  | 1.87403300 | -1.85863800 |
| N  | -0.56078200 | -2.37374200 | -1.93882400 | C | 6.70781000  | 0.32450100 | -0.09432300 |
| C  | -0.32311800 | -3.36242900 | -4.09353800 | C | 8.50480700  | 1.21131300 | -2.03521500 |

|   |             |             |             |   |            |             |             |
|---|-------------|-------------|-------------|---|------------|-------------|-------------|
| H | 0.20245000  | -4.06035000 | -4.73594400 | H | 7.02057800 | 2.72384200  | -2.47862100 |
| C | -2.10700400 | -0.70251300 | -1.33619600 | C | 7.92128200 | -0.33260700 | -0.27241300 |
| C | -1.86404800 | 0.08268000  | 0.93627600  | H | 6.00705200 | -0.03142000 | 0.65636000  |
| H | -1.37572700 | 0.10352400  | 1.90532000  | C | 8.81978000 | 0.11129600  | -1.24160800 |
| C | -3.64082700 | 1.02376800  | -0.48007200 | H | 9.20106600 | 1.55083100  | -2.79730400 |
| C | -3.17228200 | 0.18843400  | -1.49774500 | H | 8.16230400 | -1.19772900 | 0.33936800  |
| C | -2.92122300 | 0.94596700  | 0.71708500  | H | 9.76428200 | -0.40777800 | -1.38205600 |
